# Supplementary material for: Effects of Cannabidiol, ∆9-Tetrahydrocannabinol, and WIN 55-212-22 on the Viability of Canine and Human Non-Hodgkin Lymphoma Cell Lines
Source: MDPI journal article supplement (doi:10.3390/biom14040495), 2024-04-19
Supplement: s1 [file s1]

## Supplementary Figures

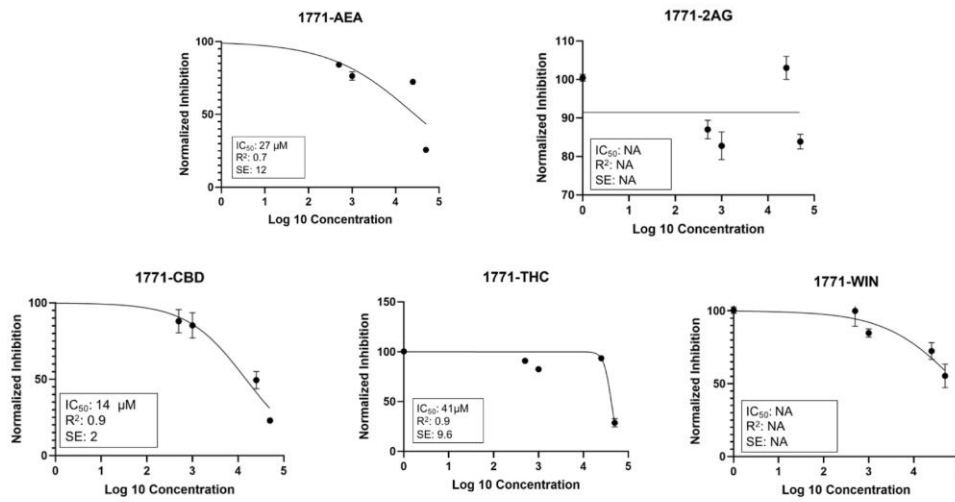

**Supplementary Figure S1.** Calculation of IC<sub>50</sub> for AEA, 2AG, CBD, THC and WIN using MTT-cell viability percent inhibition-dose response curves expressed as log 10 of concentration in (nM) vs percent inhibition of 1771 cell viability.

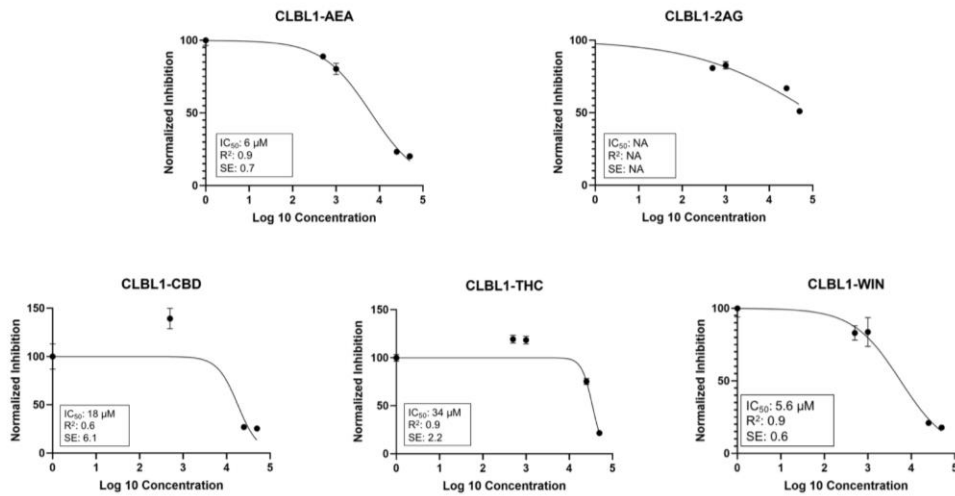

**Supplementary Figure S2.** Calculation of IC<sub>50</sub> for AEA, 2AG, CBD, THC and WIN using MTT-cell viability percent inhibition-dose response curves expressed as log 10 of concentration in (nM) vs percent inhibition of CLBL1 cell viability.

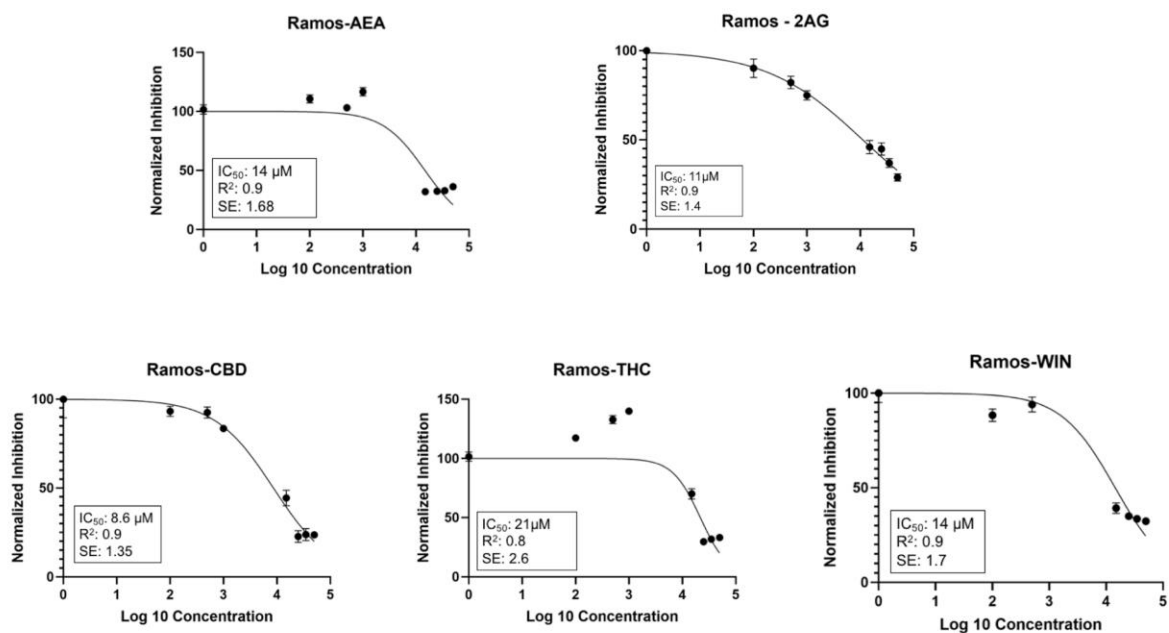

**Supplementary Figure S3.** Calculation of  $IC_{50}$  for AEA, 2AG, CBD, THC and WIN using MTT- cell viability percent inhibition-dose response curves expressed as log 10 of concentration in (nM) vs percent inhibition of Ramos cell viability.

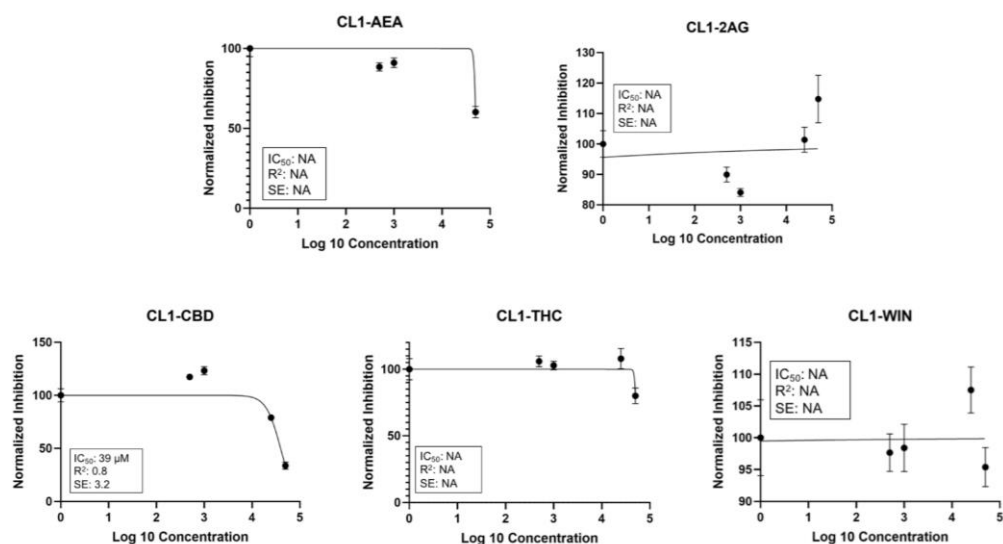

**Supplementary Figure S4.** Calculation of  $IC_{50}$  for AEA, 2AG, CBD, THC and WIN using MTT- cell viability percent inhibition-dose response curves expressed as log 10 of concentration in (nM) vs percent inhibition of CL1 cell viability.

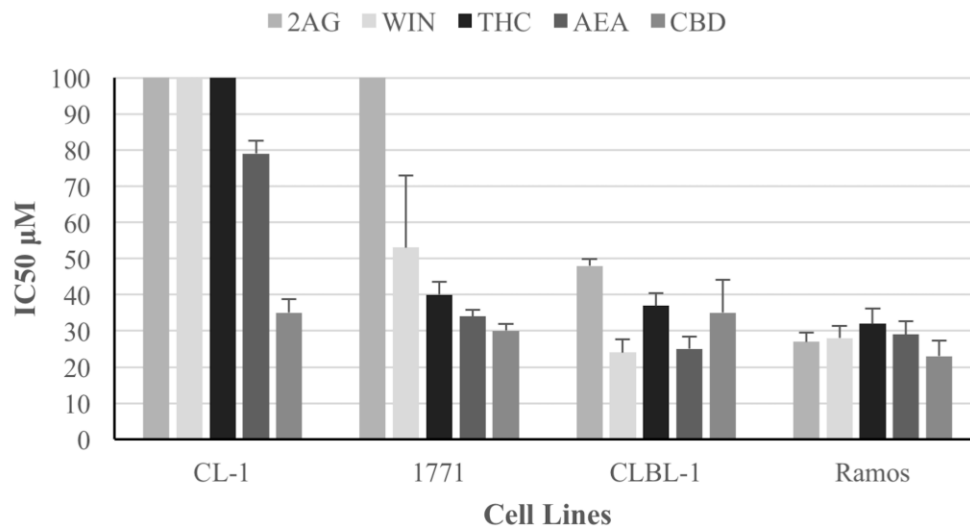

**Supplementary Figure S5.** Graphic representation of IC<sub>50</sub> values of endocannabinoids (AEA, 2AG), phytocannabinoids (CBD, THC), and a synthetic cannabinoid (WIN) in NHL cell lines.
